# Supplementary material for: Insights into the role of a structural promoter (Ba) in three-way catalyst Pd/CeO2–ZrO2 using in situ DRIFTS
Source: Royal Society of Chemistry journal article supplement (doi:10.1039/c5cy00117j), 2015-01-01
Supplement: c5cy00117j1.pdf [file c5cy00117j1.pdf]

## Supplementary information

### Insight into the role of structural promoter (Ba) in three-way catalyst Pd/CeO<sub>2</sub>-ZrO<sub>2</sub> using in situ DRIFTS

Linyan Yang, Xue Yang, Siyu Lin, Renxian Zhou\*

Institute of Catalysis, Zhejiang University, Hangzhou 310028, China

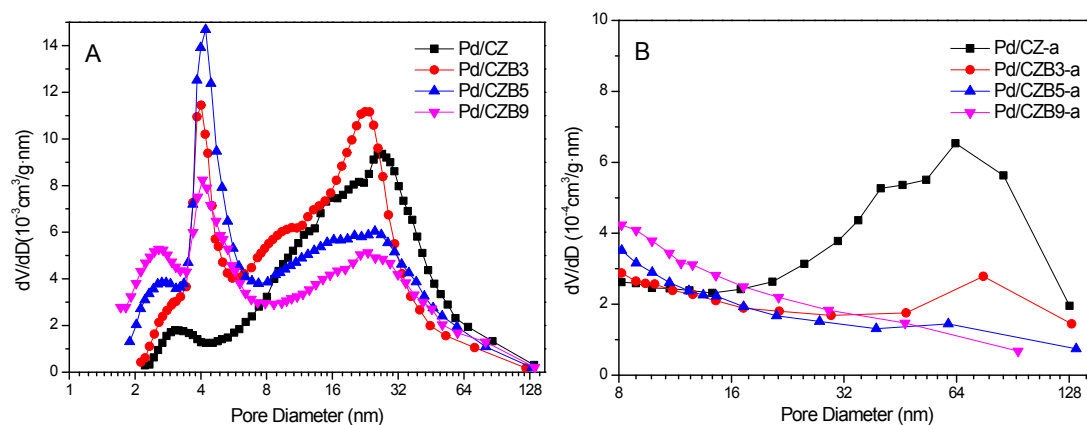

**Fig. S1.** BJH pore-size distribution of fresh (A) and aged (B) catalysts.

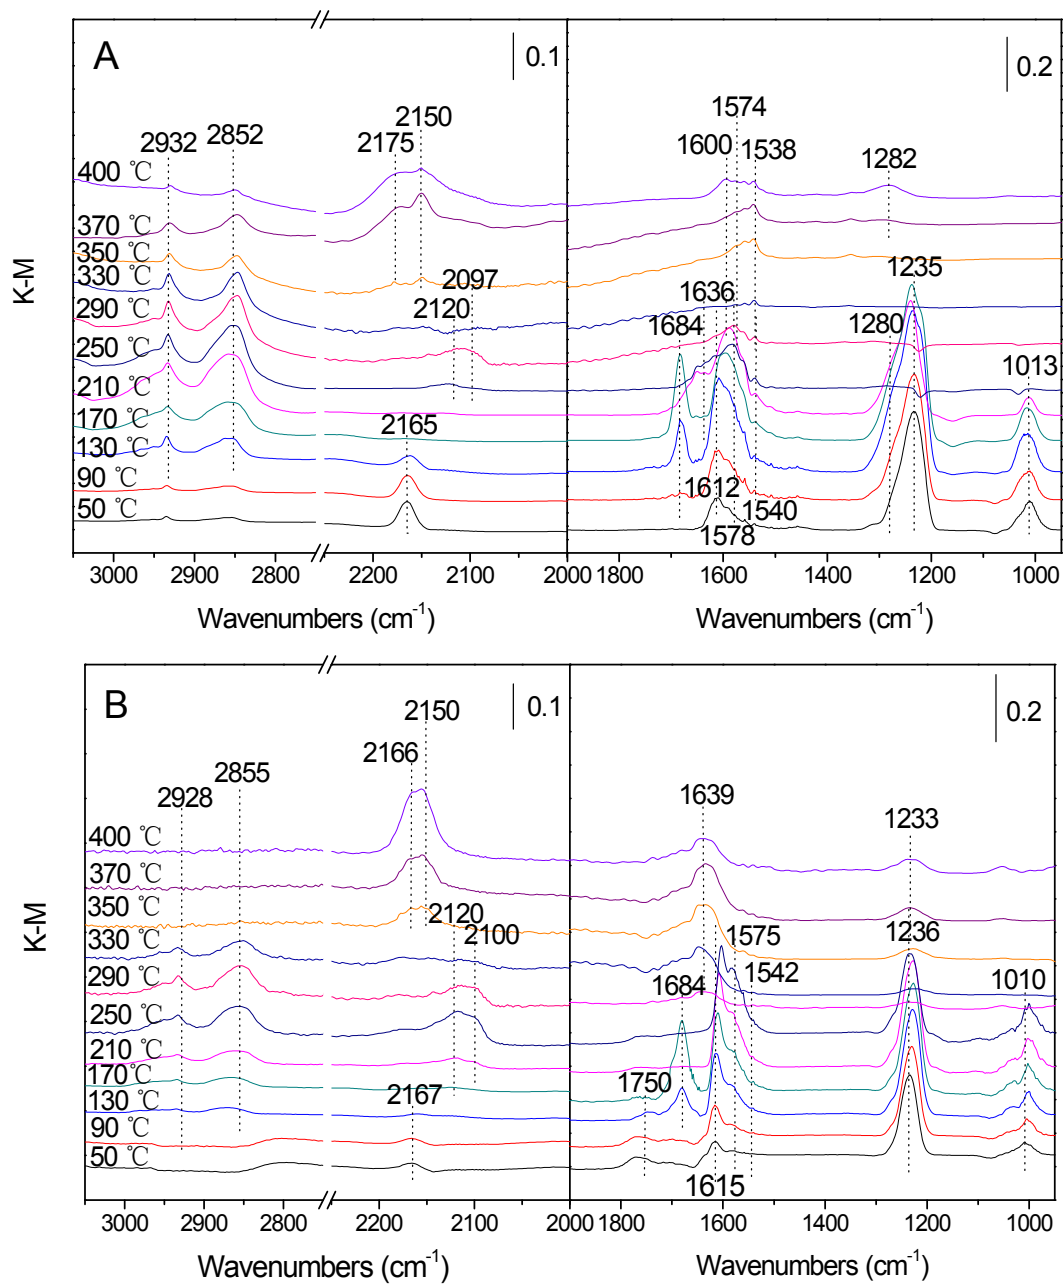

**Fig. S2.** In situ DRIFTS spectra over Pd/CZB3 (A) and Pd/CZB9 (B) catalysts under simulated reaction condition.
